# Supplementary material for: Determination of amino groups on functionalized graphene oxide for polyurethane nanomaterials: XPS quantitation vs. functional speciation
Source: Royal Society of Chemistry journal article supplement (doi:10.1039/c6ra28745j), 2017-01-01
Supplement: c6ra28745j1.pdf [file c6ra28745j1.pdf]

**Determination of amino groups on functionalized graphene oxide for polyurethane  
nanomaterials: XPS quantitation vs. functional speciation**

Jakub Ederer<sup>1\*</sup>, Pavel Janoš<sup>1</sup>, Petra Ecorchard<sup>2</sup>, Jakub Tolasz<sup>2</sup>, Václav Štengl<sup>2</sup>,  
Hynek Beneš<sup>3</sup>, Magdalena Perchacz<sup>3</sup>, Ognen Pop-Georgievski<sup>4</sup>

Supplementary material

Content:

S1. Sample characterization

S2. Calibration plot, Absorption spectra of AO7

S3. References

S1. Sample characterization

\*Corresponding author: Tel: +420-475-284-111; Fax: +420-475-284-158.

E-mail: [jakub.ederer@ujep.cz](mailto:jakub.ederer@ujep.cz) (Jakub Ederer).

The quality of the oxidation of graphene has been proved by X-ray diffraction. The diffraction line was observed at  $11.0^\circ$  (see Fig. S1.), the result corresponds to the literature.<sup>1,2</sup> The GO-NH<sub>2</sub> prepared from GO show peaks where a strong peak at  $11.0^\circ$  disappeared and broad peaks with a low intensity appear at  $8.8^\circ$ ,  $24.6^\circ$  (Fig. S1.). The partial reduction of GO is shown by presents of a broad peak at  $24.6^\circ$ .<sup>3</sup> The second broad peak at  $8.8^\circ$  proved the amination of GO where the interlayer distance is larger (about 1.00 nm) than for GO because of the functional group exchange.

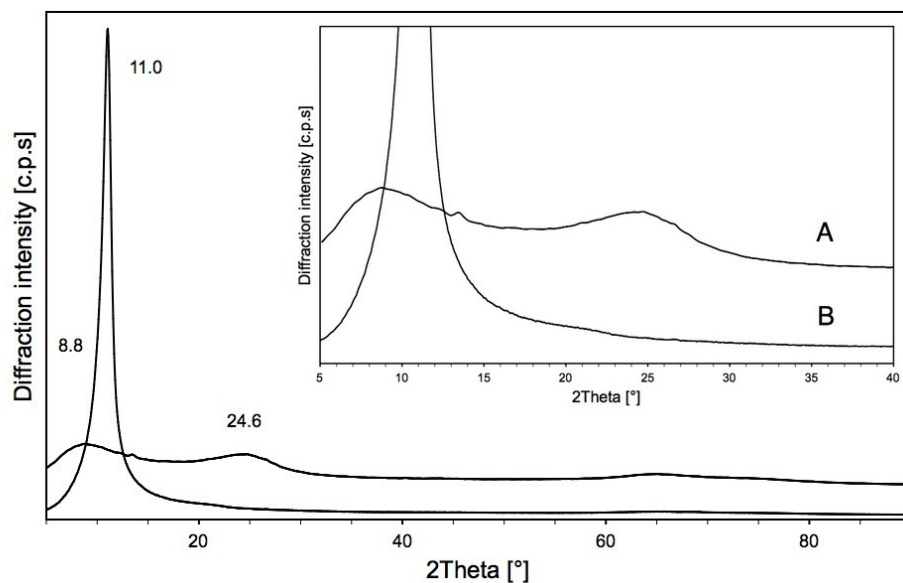

Fig. S1. XRD patterns of prepared samples: A) GO-1; B) GO-3

The Raman spectra of GO and GO-NH<sub>2</sub> are shown in Fig. S2. The Raman spectrum can show the quality of the oxidation. The strong bands D and G are corresponding to the breathing mode of C-sp<sup>2</sup> atoms in ring at  $1352\text{ cm}^{-1}$  and the in-plane bond stretching motion of C-sp<sup>2</sup> atoms at  $1598\text{ cm}^{-1}$ .<sup>4</sup> In this case there was no shifting of D or G band after amination. Anyway, the appearance of an intense D band at  $1352\text{ cm}^{-1}$  indicate well done oxidation of graphene. The 2D band at  $2705\text{ cm}^{-1}$  is mostly featureless for GO, therefore we have omitted from the spectra.

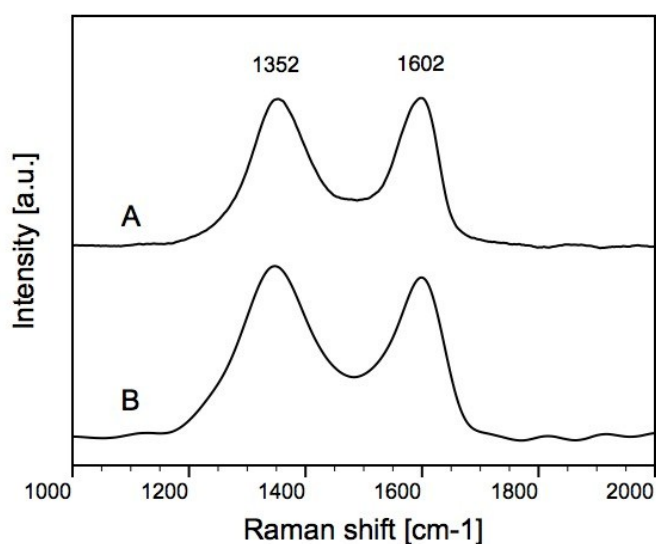

Fig.S2.Raman spectra of prepared samples: A) GO-3) and B) GO-1

### S2. Calibration plot of AO7 in BRB

Amount of free AO7 after adsorption experiment was evaluated by equation obtained from linear regression of calibration plot  $y = 18062x + 0.0368$ , with good correlation coefficient ( $R^2 = 0.9989$ ) and RSD < 3% as can be seen in Fig.S3. In the Fig.S4 it is shown the absorption spectrum of  $6.5 \times 10^{-5}$  mol/L AO7 in BRB (pH = 3.60). As can be seen in Fig. S4 there is only one absorption maximum at  $\lambda_{MAX} = 484$  nm.

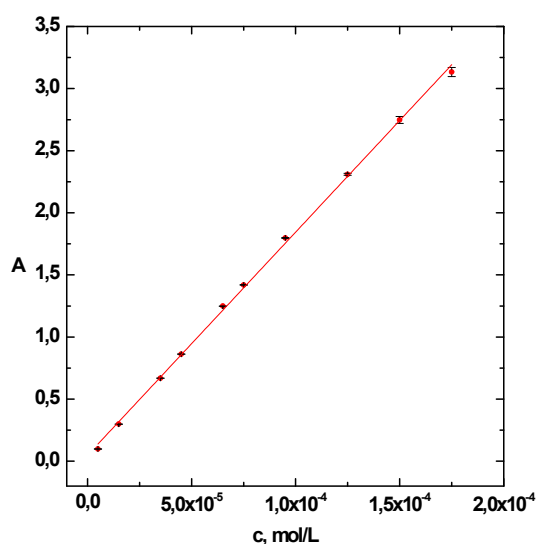

Fig. S3. Calibration plot of AO7 in BRB (pH = 3.60)

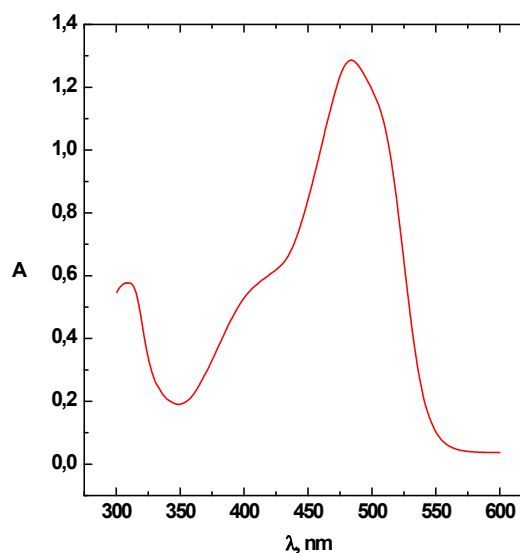

Fig. S4. Absorption spectrum of  $6.5 \times 10^{-5}$  mol/L AO7 in BRB (pH=3.60)

### S3. References

- 1 S. Kashyap, S. Mishra and S. K. Behera, 2014, **2014**.
  - 2 V. Štengl, *Chem. - A Eur. J.*, 2012, **18**, 14047–14054.
  - 3 T. D. Dao and H. M. Jeong, *Mater. Res. Bull.*, 2015, **70**, 651–657.
  - 4 K. N. Kudin, B. Ozbas, H. C. Schniepp, R. K. Prud'homme, I. A. Aksay and R. Car, *Nano Lett.*, 2008, **8**, 36–41.
-
